# Supplementary material
Source: publisher figshare collection journal article supplement (https://acs.figshare.com/ndownloader/files/3949618)
Supplement: Supplementary file 1 [file 3949618]

Supporting Information: **Cation Gating and Relocation during the Highly Selective ‘Trapdoor’ Adsorption of CO<sub>2</sub> on Univalent Cation forms of Zeolite Rho**

Magdalena M. Lozinska,<sup>1</sup> John P. S. Mowat,<sup>1</sup> Paul A. Wright,<sup>1,\*</sup> Stephen P. Thompson,<sup>2</sup> Jose L. Jorda,<sup>3</sup> Miguel Palomino,<sup>3</sup> Susana Valencia<sup>3</sup> and Fernando Rey<sup>3</sup>

<sup>1</sup> EaStCHEM School of Chemistry, University of St Andrews, Purdie Building, North Haugh, St Andrews, Fife, KY16 9ST, Scotland, [paw2@st-andrews.ac.uk](mailto:paw2@st-andrews.ac.uk); <sup>2</sup> Diamond Light Source Ltd, Harwell Science and Innovation Campus, Didcot, Oxfordshire, OX11 0DE, UK; <sup>3</sup> Instituto de Tecnología Química (UPV-CSIC), Universidad Politécnica de Valencia, Consejo Superior de Investigaciones Científicas, Avenida de los Naranjos s/n, 46022 Valencia, Spain

**Contents**

- S1. Experimental details of synthesis and ion exchange of Na,Cs-Rho and K-chabazite
- S2. Detailed description of measurements of CO<sub>2</sub> and CH<sub>4</sub> isotherms
- S3. Calorimetric measurements
- S4. *In situ* synchrotron PXRD of Na-Rho during CO<sub>2</sub> adsorption
- S5. Crystallographic details of the refined dehydrated Na-Rho, Cs-Rho, K-Rho and K-chabazite and those solids with adsorbed CO<sub>2</sub>
- S6. Fractional atomic coordinates, occupancies and isotropic displacement parameters (in Å<sup>2</sup>) and the Rietveld plots of Na-Rho, dehydrated and with adsorbed CO<sub>2</sub>
- S7. Fractional atomic coordinates, occupancies and isotropic displacement parameters (in Å<sup>2</sup>) of Cs-Rho dehydrated and with adsorbed CO<sub>2</sub>
- S8. *In situ* laboratory PXRD of K-Rho with adsorbed CO<sub>2</sub>
- S9. Fractional atomic coordinates, occupancies and isotropic displacement parameters (in Å<sup>2</sup>) of K-Rho dehydrated and with adsorbed CO<sub>2</sub>: Rietveld plots of K-Rho dehydrated, with adsorbed CO<sub>2</sub> (0.5 bar, 1 bar) and with CO<sub>2</sub> removed
- S10. Cation positions in Na-, K- and Cs-Rho, dehydrated and when in contact with > 1bar CO<sub>2</sub>
- S11. Fractional atomic coordinates, occupancies and isotropic displacement parameters (in Å<sup>2</sup>) K-chabazite, dehydrated and with adsorbed CO<sub>2</sub>

## S1. Experimental details of synthesis and ion exchange of Na,Cs-Rho and K-chabazite

S1.1. Synthesis of Na,Cs-Rho – Zeolite Na,Cs-Rho was synthesized from the gel composition: 1.8 Na<sub>2</sub>O : 0.3 Cs<sub>2</sub>O: 1.0 Al<sub>2</sub>O<sub>3</sub> : 10 SiO<sub>2</sub> : 0.5 (18-crown-6) : 100 H<sub>2</sub>O, according to published procedures.<sup>1,2</sup> The starting mixture was prepared by dissolving 1,4,7,10,13,16-hexaoxacyclooctadecane (18-crown-6; C<sub>12</sub>H<sub>24</sub>O<sub>6</sub>; 1.12g;; ≥99%; Sigma-Aldrich), cesium hydroxide (CsOH; 0.75g; 99.9%; Sigma-Aldrich) and sodium hydroxide (NaOH; 0.33g; 98.5%; Fisher Chemicals) in distilled water (6.7 mL). Sodium aluminate (NaAlO<sub>2</sub>; 2.21g; 31% Na<sub>2</sub>O, 38,5% Al<sub>2</sub>O<sub>3</sub>; BDH Chemicals Ltd.) followed by colloidal silica, Ludox AS-40 (12.5g; 40%, suspension in water; Sigma-Aldrich) was added and the mixture stirred until homogeneous. The gel formed was aged at room temperature for 24 hours in a closed polypropylene bottle under continuous stirring. The crystallization was carried out under static conditions in the same closed polypropylene bottle for 8 days at 383 K. After reaction, the solid obtained was filtered, washed with distilled water then dried at 373 K overnight. The as-prepared Na,Cs-Rho was heated at 823 K under oxygen for 12 hours to remove the template.

S1.2. Ion exchange and determination of the unit cell composition of Na,Cs-Rho – Ion exchange of Na,Cs-Rho was conducted according to published procedures.<sup>2-6</sup> The calcined Na,Cs-Rho was fully exchanged with 10% NH<sub>4</sub>Cl solution (99.9%; Alfa Aesar) and then with 10% nitrate solutions of Na, Cs and K (99.5-99.9%; Sigma-Aldrich) at 353 K in a round bottom flask with condenser. In all cases cation exchange was continued until EDX indicated the exchange was complete.

The unit cell compositions of all Rho samples were estimated from a combination of EDX analysis and MAS NMR spectroscopy. EDX analysis was performed in a JEOL JSM 5600 SEM, with an Oxford INCA Energy 200 EDX analyser. Solid-state <sup>29</sup>Si MASNMR was performed using a Varian VNMRs spectrometer operating at 79.44 MHz for <sup>29</sup>Si. Deconvolution of the <sup>29</sup>Si MASNMR of the as-prepared Na,Cs-Rho, in which all aluminium occupies tetrahedral sites and all tetrahedral sites are crystallographically equivalent, was used to determine the framework Si/Al ratio of zeolite Rho and used to calibrate the Si/Al ratios determined via EDX. The Si/Al ratio measured in the as-prepared zeolite Rho was obtained by EDX as 4.0 and by deconvolution of the <sup>29</sup>Si MAS NMR spectrum as 3.9. The NMR value was taken as the more accurate, and compositions calculated accordingly for all

Rho materials. Full details of the composition of cation-exchanged zeolites are given in a table below.

Table S1.1 Unit Cell Compositions determined by EDX.

| Sample    | Atomic % from EDX |        |       |         |         |       | Unit cell formula of dehydrated sample                                                   |
|-----------|-------------------|--------|-------|---------|---------|-------|------------------------------------------------------------------------------------------|
|           | O                 | Si     | Al    | Na      | Cs      | K     |                                                                                          |
| Na,Cs-Rho | 68 ± 1            | 21 ± 1 | 5 ± 1 | 4 ± 0.5 | 2 ± 0.5 | N.D.  | Na <sub>6.8</sub> Cs <sub>3.0</sub> Al <sub>9.8</sub> Si <sub>38.2</sub> O <sub>96</sub> |
| Na-Rho    | 70 ± 1            | 20 ± 1 | 5 ± 1 | 5 ± 1   | N.D.    | N.D.  | Na <sub>9.8</sub> Al <sub>9.8</sub> Si <sub>38.2</sub> O <sub>96</sub>                   |
| Cs-Rho    | 68 ± 1            | 20 ± 1 | 5 ± 1 | N.D.    | 7 ± 1   | N.D.  | Cs <sub>9.8</sub> Al <sub>9.8</sub> Si <sub>38.2</sub> O <sub>96</sub>                   |
| K-Rho     | 67 ± 1            | 21 ± 1 | 5 ± 1 | N.D.    | N.D.    | 6 ± 1 | K <sub>9.8</sub> Al <sub>9.8</sub> Si <sub>38.2</sub> O <sub>96</sub>                    |

Values for oxygen are semi-quantitative  
N.D. – not detected

S1.3. Synthesis of K-chabazite – Zeolite K-chabazite was synthesized from the gel composition: 2.65 K<sub>2</sub>O: 1.0 Al<sub>2</sub>O<sub>3</sub>: 4.8 SiO<sub>2</sub>: 183 H<sub>2</sub>O, according to a published procedure.<sup>7</sup> Na-Y zeolite (CF-900; 8g; 0.70 mmol; Crosfield) was exchanged by mechanical stirring for 24 hours at 353 K with 2 M ammonium chloride solution (NH<sub>4</sub>Cl; 99.9%; Alfa Aesar). The mixture was filtered and to the filtrate a new volume of NH<sub>4</sub>Cl was added. The procedure was repeated five times, and the NH<sub>4</sub>-Y was dried at 373 K overnight and heated at 823 K, to remove NH<sub>3</sub>, leaving the protonic form of zeolite Y. H-Y was then suspended in distilled water (64 mL) and an aqueous solution of potassium hydroxide (KOH; 9g; 98.5%; Fisher Chemicals) was added. The mixture was stirred for 1 hour, and then was transferred into a polypropylene bottle. The gel was heated in the oven at 368 K for 4 days and the solid product was recovered by filtration, washed with distilled water, and dried at 373 K.

## S2. Detailed description of measurement of CO<sub>2</sub> and CH<sub>4</sub> isotherms

The adsorption isotherms in the pressure range up to 900 kPa were measured in an IGA-3 gravimetric analyzer (Hidden Isochema) using approximately 50 mg of sample, that were placed in the balance and outgassed at 673 K under vacuum during 4 h before each adsorption experiment. The temperature of the sample was subsequently reduced under vacuum until the target temperature (between 283 K and 333 K) was reached. The CO<sub>2</sub> and CH<sub>4</sub> adsorption measurements were performed by introducing gas to build up the desired pressures into the gravimetric system. The equilibrium conditions were fixed at 98% of the calculated uptake using the Avrami-Erofe'ev model or a maximum equilibration time of 120 min for each point of the isotherm. Selected adsorption isotherms in the low pressure range were measured in a Micromeritics ASAP 2010 instrument using approximately 150 mg of adsorbent placed in a sample holder that was immersed into a liquid circulation thermostatic bath for precise temperature control. Before each measurement, the sample was treated overnight at 673 K under vacuum. Adsorption isotherms were then acquired at 283, 298, 313 and 333 K.

For Na-Rho, the high pressure (gravimetric) and low pressure (volumetric) isotherms at each temperature were combined (see Figure S2.1)

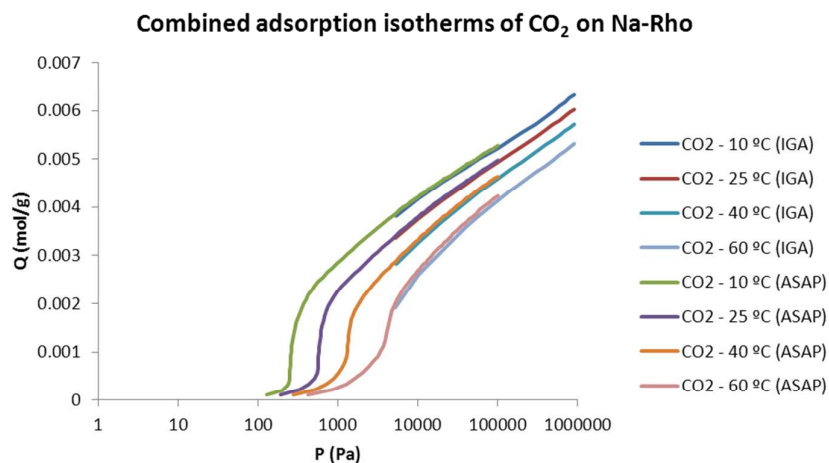

Figure S2.1. Adsorption isotherms of CO<sub>2</sub> on Na-Rho, determined by combining low pressure data measured volumetrically and high pressure data measured gravimetrically.

These combined isotherms were fitted using a Virial-type equation and the differential isosteric heat of CO<sub>2</sub> adsorption ( $q_{st}$ ) was calculated at different coverages from the fitted isotherms by applying the Clausius-Clapeyron equation:

$$q_{st} = R \cdot T^2 \cdot \left[ \frac{\partial(\ln P)}{\partial T} \right]_{Q_i} \equiv R \cdot \left[ - \frac{\partial(\ln P)}{\partial \left( \frac{1}{T} \right)} \right]_{Q_i}$$

The isosteric heats of adsorption are given as a function of loading below.

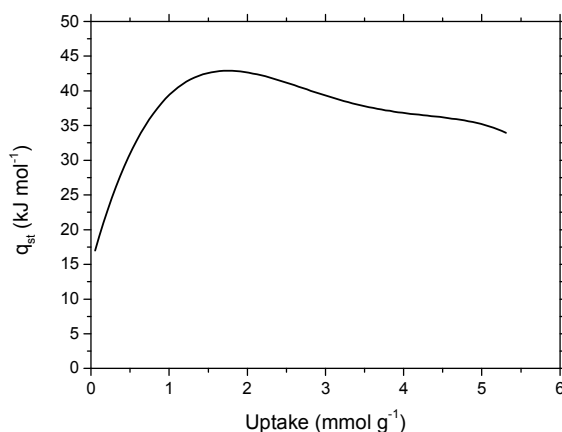

Figure S2.2. The isosteric heat of adsorption of CO<sub>2</sub> on Na-Rho,  $q_{st}$ , as a function of uptake, calculated from adsorption isotherms at 283, 298, 313 and 333 K.

### S3. Calorimetric measurements

The heat of adsorption of CO<sub>2</sub> was determined by calorimetric adsorption measurements performed on a Sensys-Evo Calorimeter from Setaram equipped with a thermogravimetric accessory.

The partial pressure of CO<sub>2</sub> was modified by mixing CO<sub>2</sub> in He using appropriate gas flow controllers at the entrance of the calorimetric instrument. Prior to each adsorption experiment, the sample was dehydrated by flowing He at 673 K for 2 hours and then cooled down to 303 K (selected as adsorption temperature). Once the temperature was stable, the selected CO<sub>2</sub>/He flow was put in contact with the sample and the evolved heat of adsorption was continuously measured. Typical plots of these measurements are shown below:

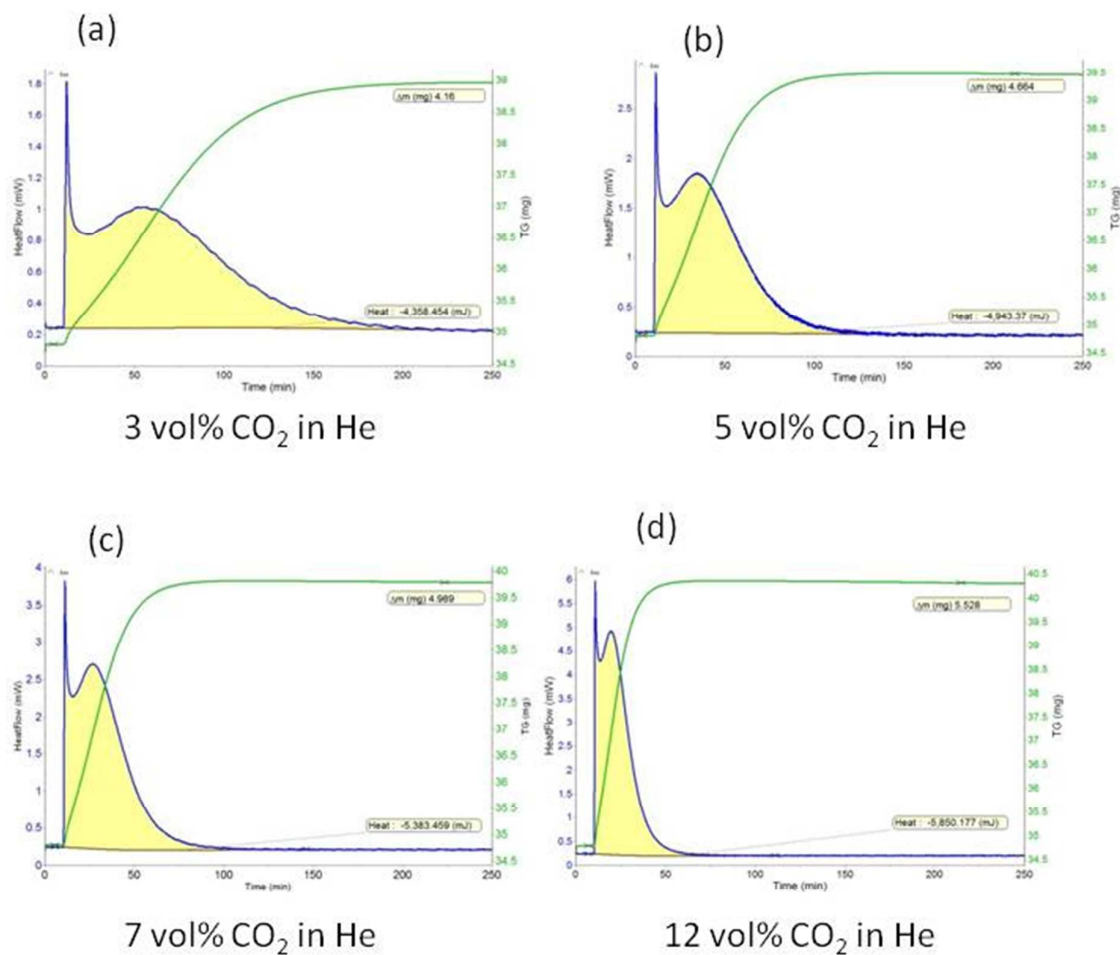

Figure S3.1. Heats of adsorption measured by calorimetry as CO<sub>2</sub>/He gas mixtures with different CO<sub>2</sub> contents are passed over Na-Rho and the evolved heat (blue curve, yellow area) and CO<sub>2</sub> uptake (green curve) are measured.

S4. *In situ* synchrotron PXRD of Na-Rho during CO<sub>2</sub> adsorption

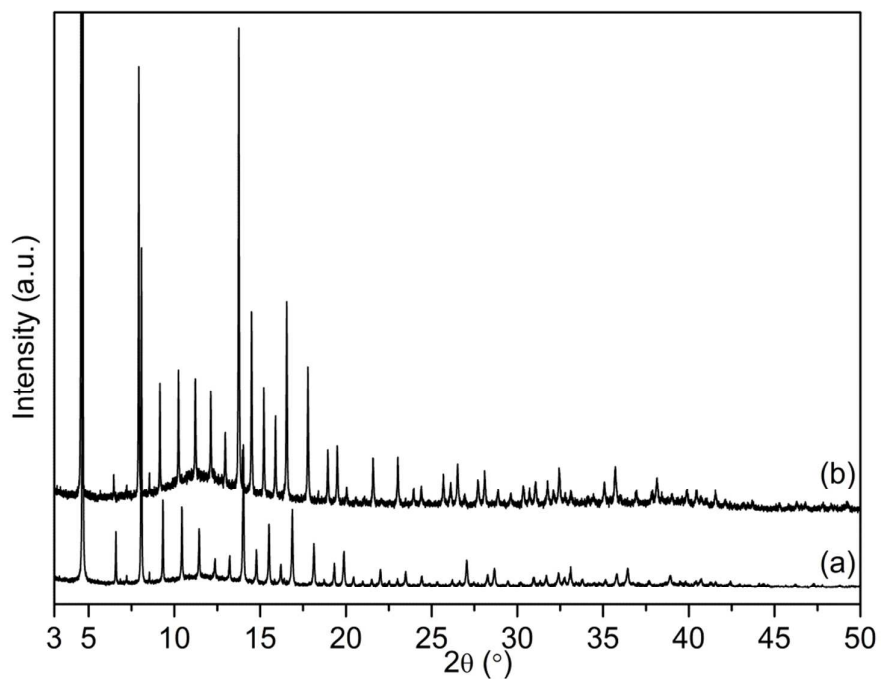

Figure S4.1 *In situ* synchrotron PXRD ( $\lambda = 0.827159(2)$  Å) of Na-Rho during CO<sub>2</sub> adsorption. (a) Sample dehydrated at 723 K and cooled down to RT and (b) sample in equilibrium with 1 bar of CO<sub>2</sub>. The (offset) patterns have been collected at 298 K using the same operating conditions.

S5. Crystallographic details of the refined dehydrated Na-Rho, Cs-Rho, K-Rho and K-chabazite and those solids with adsorbed CO<sub>2</sub>

Table S5

|                             | Na-Rho                                                                 | Na-Rho (1 bar CO <sub>2</sub> )                                                           | Cs-Rho                                                                 | Cs-Rho (4 bar CO <sub>2</sub> )                                                           |
|-----------------------------|------------------------------------------------------------------------|-------------------------------------------------------------------------------------------|------------------------------------------------------------------------|-------------------------------------------------------------------------------------------|
| <b>Unit cell</b>            | Na <sub>9.8</sub> Al <sub>9.8</sub> Si <sub>38.2</sub> O <sub>96</sub> | Na <sub>9.8</sub> Al <sub>9.8</sub> Si <sub>38.2</sub> O <sub>96</sub> ·12CO <sub>2</sub> | Cs <sub>9.8</sub> Al <sub>9.8</sub> Si <sub>38.2</sub> O <sub>96</sub> | Cs <sub>9.8</sub> Al <sub>9.8</sub> Si <sub>38.2</sub> O <sub>96</sub> ·11CO <sub>2</sub> |
| <b>Temperature/K</b>        | 298                                                                    | 298                                                                                       | 298                                                                    | 298                                                                                       |
| <b>Space group</b>          | <i>I</i> $\bar{4}3m$                                                   | <i>I</i> $\bar{4}3m$                                                                      | <i>I</i> $\bar{4}3m$                                                   | <i>Im</i> $\bar{3}m$                                                                      |
| <b>X-ray source</b>         | Beamline II 1                                                          | Beamline II 1                                                                             | Cu                                                                     | Cu                                                                                        |
| <b>Diffractometer</b>       | Synchrotron                                                            | Synchrotron                                                                               | PANalytical                                                            | PANalytical                                                                               |
| <b>Wavelength(s) (Å)</b>    | 0.827159(2)                                                            | 0.827159(2)                                                                               | 1.54056<br>1.54430                                                     | 1.54056<br>1.54430                                                                        |
| <b>a/ Å</b>                 | 14.4139(6)                                                             | 14.6513(6)                                                                                | 14.6287(6)                                                             | 14.9960(1)                                                                                |
| <b>Volume/Å<sup>3</sup></b> | 2994.62(1)                                                             | 3145.04(1)                                                                                | 3130.5(1)                                                              | 3372(3)                                                                                   |
| <b>R<sub>p</sub></b>        | 0.0790                                                                 | 0.0807                                                                                    | 0.0345                                                                 | 0.0236                                                                                    |
| <b>R<sub>wp</sub></b>       | 0.1067                                                                 | 0.1045                                                                                    | 0.0454                                                                 | 0.0277                                                                                    |
| <b>χ<sup>2</sup></b>        | 2.533                                                                  | 5.453                                                                                     | 2.223                                                                  | 1.814                                                                                     |

  

|                             | K-Rho                                                                 | K-Rho (0.5 bar CO <sub>2</sub> )                                                        | K-Rho (1 bar CO <sub>2</sub> )                                                           | K-Rho (heated after CO <sub>2</sub> adsorption)                       |
|-----------------------------|-----------------------------------------------------------------------|-----------------------------------------------------------------------------------------|------------------------------------------------------------------------------------------|-----------------------------------------------------------------------|
| <b>Unit cell</b>            | K <sub>9.8</sub> Al <sub>9.8</sub> Si <sub>38.2</sub> O <sub>96</sub> | K <sub>9.8</sub> Al <sub>9.8</sub> Si <sub>38.2</sub> O <sub>96</sub> ·xCO <sub>2</sub> | K <sub>9.8</sub> Al <sub>9.8</sub> Si <sub>38.2</sub> O <sub>96</sub> ·11CO <sub>2</sub> | K <sub>9.8</sub> Al <sub>9.8</sub> Si <sub>38.2</sub> O <sub>96</sub> |
| <b>Temperature/K</b>        | 298                                                                   | 298                                                                                     | 298                                                                                      | 298                                                                   |
| <b>Space group</b>          | <i>I</i> $\bar{4}3m$                                                  | <i>I</i> $\bar{4}3m$                                                                    | <i>I</i> $\bar{4}3m$                                                                     | <i>I</i> $\bar{4}3m$                                                  |
| <b>X-ray source</b>         | Beamline II 1                                                         | Beamline II 1                                                                           | Beamline II 1                                                                            | Cu                                                                    |
| <b>Diffractometer</b>       | Synchrotron                                                           | Synchrotron                                                                             | Synchrotron                                                                              | PANalytical                                                           |
| <b>Wavelengths (Å)</b>      | 0.826956(2)                                                           | 0.826956(2)                                                                             | 0.826956(2)                                                                              | 1.54056<br>1.54430                                                    |
| <b>a/ Å</b>                 | 14.5959(3)                                                            | (I) 14.6612(7)<br>(II) 14.7435(8)                                                       | 14.7631(3)                                                                               | 14.6078(7)                                                            |
| <b>Volume/Å<sup>3</sup></b> | 3109.54(5)                                                            | (I) 3151.41(1)<br>(II) 3204.77(5)                                                       | 3217.63(5)                                                                               | 3117.1(1)                                                             |
| <b>R<sub>p</sub></b>        | 0.0158                                                                | 0.0211                                                                                  | 0.0267                                                                                   | 0.0639                                                                |
| <b>R<sub>wp</sub></b>       | 0.0233                                                                | 0.0280                                                                                  | 0.0187                                                                                   | 0.0333                                                                |
| <b>χ<sup>2</sup></b>        | 5.002                                                                 | 17.190                                                                                  | 18.170                                                                                   | 4.147                                                                 |

  

|                             | K-chabazite                                                     | K-chabazite (1 bar CO <sub>2</sub> )                                              |
|-----------------------------|-----------------------------------------------------------------|-----------------------------------------------------------------------------------|
| <b>Unit cell</b>            | K <sub>9</sub> Al <sub>9</sub> Si <sub>27</sub> O <sub>72</sub> | K <sub>9</sub> Al <sub>9</sub> Si <sub>27</sub> O <sub>72</sub> ·9CO <sub>2</sub> |
| <b>Temperature/K</b>        | 298                                                             | 298                                                                               |
| <b>Space group</b>          | <i>R</i> $\bar{3}m$                                             | <i>R</i> $\bar{3}m$                                                               |
| <b>X-ray source</b>         | Cu                                                              | Cu                                                                                |
| <b>Diffractometer</b>       | STOE                                                            | PANalytical                                                                       |
| <b>Wavelength(s) (Å)</b>    | 1.54056                                                         | 1.54056<br>1.54430                                                                |
| <b>a/ Å</b>                 | 13.7242(7)                                                      | 13.982(9)                                                                         |
| <b>c/ Å</b>                 | 14.630(4)                                                       | 14.735(2)                                                                         |
| <b>Volume/Å<sup>3</sup></b> | 2386.5(8)                                                       | 2495(8)                                                                           |
| <b>R<sub>p</sub></b>        | 0.0888                                                          | 0.0469                                                                            |
| <b>R<sub>wp</sub></b>       | 0.1130                                                          | 0.0624                                                                            |
| <b>χ<sup>2</sup></b>        | 2.120                                                           | 4.102                                                                             |



S6. Fractional atomic coordinates, occupancies and isotropic displacement parameters (in Å<sup>2</sup>) and the Rietveld plots of Na-Rho, dehydrated and with adsorbed CO<sub>2</sub>

Table S6

| Na-Rho   | x         | y         | z         | Occup.   | Multipl. | Uiso      |
|----------|-----------|-----------|-----------|----------|----------|-----------|
| Si1      | 0.2740(2) | 0.1224(2) | 0.4255(2) | 0.8      | 48       | 0.0200(8) |
| Al1      | 0.2740(2) | 0.1224(2) | 0.4255(2) | 0.2      | 48       | 0.0200(8) |
| O1       | 0.0386(3) | 0.2106(3) | 0.3866(4) | 1        | 48       | 0.0200(8) |
| O2       | 0.2190(4) | 0.2190(4) | 0.4037(6) | 1        | 24       | 0.0200(8) |
| O3       | 0.1159(4) | 0.1159(4) | 0.6296(4) | 1        | 24       | 0.0200(8) |
| Na (S8R) | 0.3850(1) | 0         | 0         | 0.506(9) | 12       | 0.0200(8) |
| Na (S6R) | 0.3132(7) | 0.3132(7) | 0.3132(7) | 0.433(2) | 8        | 0.0200(8) |

  

| Na-Rho (1 bar) | x         | y         | z         | Occup.   | Mult. | Uiso      |
|----------------|-----------|-----------|-----------|----------|-------|-----------|
| Si1            | 0.2676(2) | 0.1174(2) | 0.4181(2) | 0.8      | 48    | 0.0115(6) |
| Al1            | 0.2676(2) | 0.1174(2) | 0.4181(2) | 0.2      | 48    | 0.0115(6) |
| O1             | 0.0303(3) | 0.2108(3) | 0.3769(4) | 1        | 48    | 0.0115(6) |
| O2             | 0.2101(4) | 0.2101(4) | 0.3928(7) | 1        | 24    | 0.0115(6) |
| O3             | 0.1342(4) | 0.1342(4) | 0.6202(4) | 1        | 24    | 0.0115(6) |
| Na (S6R)       | 0.3990(7) | 0.3990(7) | 0.3990(7) | 0.490(1) | 8     | 0.0286(3) |
| Na (S8R)       | 0.0183(1) | 0.0183(1) | 0.4426(1) | 0.25     | 24    | 0.0286(3) |
| O(CO2)1a       | 0.3922(1) | 0         | 0         | 0.5      | 12    | 0.068(7)  |
| O(CO2)1b       | 0.2301(1) | 0         | 0         | 0.5      | 12    | 0.068(7)  |
| C(CO2)1        | 0.3106(1) | 0         | 0         | 0.5      | 12    | 0.068(7)  |
| O(CO2)2a       | 0.1337(1) | 0.1337(2) | 0.0505(1) | 0.24983  | 24    | 0.068(7)  |
| O(CO2)2b       | 0.1958(1) | 0.1274(3) | 0.1958(1) | 0.24983  | 24    | 0.068(7)  |
| C(CO2)2        | 0.1352(1) | 0.1350(1) | 0.1350(1) | 0.74939  | 8     | 0.068(7)  |

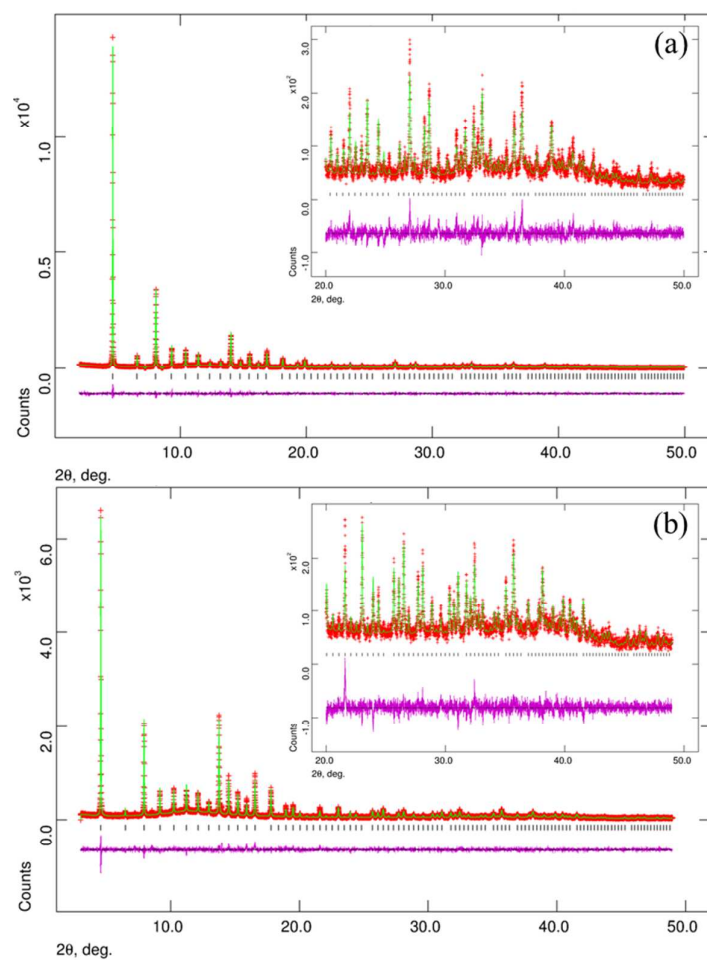

Figure S6.1 Final observed, calculated and difference Rietveld plots for the synchrotron powder data refinement ( $\lambda = 0.827159(2) \text{ \AA}$ ) of (a) dehydrated Na-Rho and (b) Na-Rho in equilibrium with 1 bar of  $\text{CO}_2$ .

S7. Fractional atomic coordinates, occupancies and isotropic displacement parameters (in Å<sup>2</sup>)  
of Cs-Rho dehydrated and with adsorbed CO<sub>2</sub>

Table S7

| <b>Cs-Rho</b> | <b>x</b>  | <b>y</b>  | <b>z</b>  | <b>Occup.</b> | <b>Mult.</b> | <b>Uiso</b> |
|---------------|-----------|-----------|-----------|---------------|--------------|-------------|
| Si1           | 0.2696(3) | 0.1205(2) | 0.4198(2) | 0.8           | 48           | 0.0110(2)   |
| Al1           | 0.2696(3) | 0.1205(2) | 0.4198(2) | 0.2           | 48           | 0.0110(2)   |
| O1            | 0.0292(2) | 0.2176(3) | 0.3829(5) | 1.0           | 48           | 0.0089(3)   |
| O2            | 0.2092(4) | 0.2092(4) | 0.3946(6) | 1.0           | 24           | 0.0089(3)   |
| O3            | 0.1359(4) | 0.1359(4) | 0.6322(3) | 1.0           | 24           | 0.0089(3)   |
| Cs (D8R)      | 0.0       | 0.0       | 0.5       | 1.0           | 6            | 0.0416(1)   |
| Cs (S6R)      | 0.1759(2) | 0.1759(2) | 0.1759(2) | 0.440(3)      | 8            | 0.0416(1)   |

  

| <b>Cs-Rho (4 bar)</b> | <b>x</b>  | <b>y</b>  | <b>z</b>  | <b>Occup.</b> | <b>Mult.</b> | <b>Uiso</b> |
|-----------------------|-----------|-----------|-----------|---------------|--------------|-------------|
| Si1                   | 0.25      | 0.1008(3) | 0.3992(3) | 0.8           | 48           | 0.0372(2)   |
| Al1                   | 0.25      | 0.1008(3) | 0.3992(3) | 0.2           | 48           | 0.0372(2)   |
| O1                    | 0.0       | 0.2191(5) | 0.3828(5) | 1.0           | 48           | 0.0372(2)   |
| O2                    | 0.1693(5) | 0.1693(5) | 0.3767(6) | 1.0           | 48           | 0.0372(2)   |
| Cs (S6R)              | 0.3536(4) | 0.3536(4) | 0.3536(4) | 0.233(3)      | 16           | 0.0468(2)   |
| Cs (S8R)              | 0.5       | 0.1486(4) | 0.5       | 0.5           | 12           | 0.0468(2)   |
| O(CO2)1a              | 0.4131(2) | 0.0       | 0.0       | 0.5           | 12           | 0.0468(2)   |
| O(CO2)1b              | 0.2537(2) | 0.0       | 0.0       | 0.5           | 12           | 0.0468(2)   |
| C(CO2)1               | 0.3334(2) | 0.0       | 0.0       | 0.5           | 12           | 0.0468(2)   |
| O(CO2)2a              | 0.4150(3) | 0.510(4)  | 0.4150(3) | 0.10          | 48           | 0.0468(2)   |
| O(CO2)2b              | 0.3673(3) | 0.654(4)  | 0.456(9)  | 0.05          | 96           | 0.0468(2)   |
| C(CO2)2               | 0.3956(3) | 0.583(4)  | 0.417(4)  | 0.10          | 48           | 0.0468(2)   |

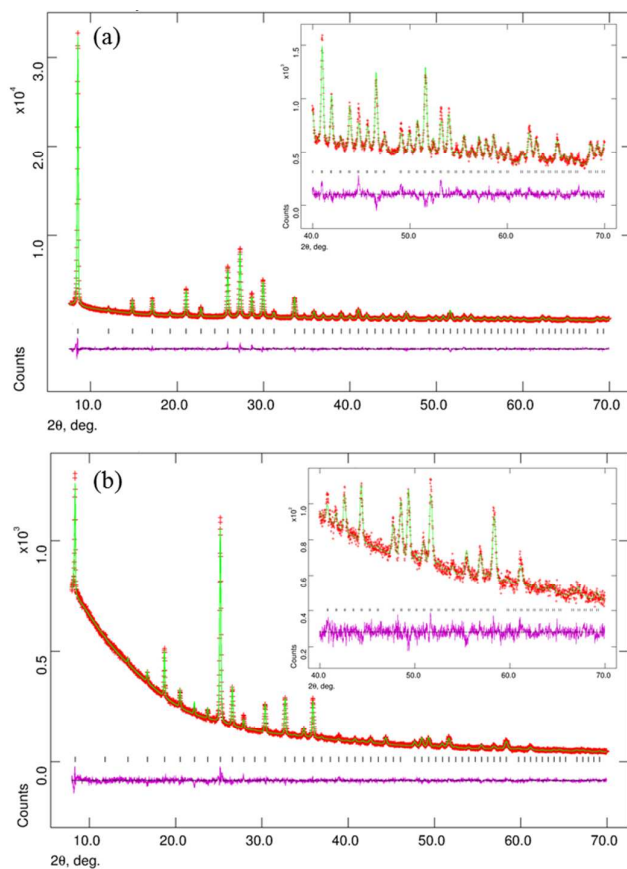

Figure 7.1 Final observed, calculated and difference Rietveld plots for the laboratory powder X-ray diffraction data refinement ( $\lambda_1 = 1.54056 \text{ \AA}$ ,  $\lambda_2 = 1.54430 \text{ \AA}$ ) of (a) dehydrated Cs-Rho and (b) Cs-Rho in equilibrium with 4 bar of  $\text{CO}_2$ .

## S8. In situ laboratory PXRD of K-Rho with adsorbed CO<sub>2</sub>

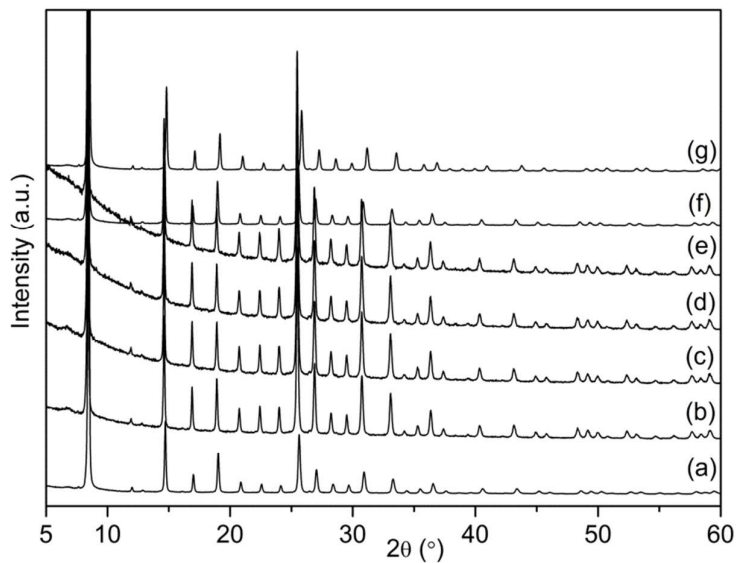

Figure S8.1 *In situ* laboratory PXRD (Cu K<sub>α1,α2</sub>) of K-Rho during CO<sub>2</sub> adsorption up to 5 bar. (a) and (g) samples dehydrated at 573 K under He flux for 2 hours and cooled down to RT and samples in equilibrium with (b) 1 bar, (c) 2 bar, (d) 3 bar, (e) 4 bar, and (f) sample dehydrated at 298 K under He flux for 2 hours. The (offset) patterns have been collected at 298 K using the same operating conditions.

S9. Fractional atomic coordinates, occupancies and isotropic displacement parameters (in  $\text{\AA}^2$ ) of K-Rho dehydrated and with adsorbed  $\text{CO}_2$ : Rietveld plots of K-Rho dehydrated, with adsorbed  $\text{CO}_2$  (0.5 bar, 1 bar) and with  $\text{CO}_2$  removed.

Table S9

| K-Rho   | x         | y         | z         | Occup.    | Mult. | Uiso      |
|---------|-----------|-----------|-----------|-----------|-------|-----------|
| Si1     | 0.2682(5) | 0.1193(5) | 0.4183(5) | 0.8       | 48    | 0.0121(7) |
| Al1     | 0.2682(5) | 0.1193(5) | 0.4183(5) | 0.2       | 48    | 0.0121(7) |
| O1      | 0.2094(1) | 0.2094(1) | 0.3971(2) | 1.0       | 48    | 0.0121(7) |
| O2      | 0.1300(1) | 0.1300(1) | 0.6239(1) | 1.0       | 24    | 0.0121(7) |
| O3      | 0.0278(1) | 0.2088(8) | 0.3863(1) | 1.0       | 24    | 0.0121(7) |
| K (D8R) | 0.5       | 0.0       | 0.0       | 0.2907(2) | 6     | 0.0248(4) |
| K (S8R) | 0.3610(2) | 0.0       | 0.0       | 0.5976(2) | 12    | 0.0547(2) |
| K (S6R) | 0.3295(4) | 0.3295(4) | 0.3295(4) | 0.1193(2) | 8     | 0.0090(8) |

  

| K-Rho (0.5 bar, I) | x          | y          | z          | Occup.    | Mult. | Uiso       |
|--------------------|------------|------------|------------|-----------|-------|------------|
| Si1                | 0.26837(2) | 0.11941(2) | 0.41735(2) | 0.8       | 48    | 0.01295(3) |
| Al1                | 0.26837(2) | 0.11941(2) | 0.41735(2) | 0.2       | 48    | 0.01295(3) |
| O1                 | 0.20768(3) | 0.20768(3) | 0.4016(5)  | 1.0       | 48    | 0.01295(3) |
| O2                 | 0.12436(3) | 0.12436(3) | 0.6274(4)  | 1.0       | 24    | 0.01295(3) |
| O3                 | 0.02515(3) | 0.21486(3) | 0.38511(3) | 1.0       | 24    | 0.01295(3) |
| K (S6R)            | 0.31686(4) | 0.31686(4) | 0.31686(4) | 0.4328    | 8     | 0.01295(3) |
| K (S8R)            | 0.3644(5)  | 0.0        | 0.0        | 0.5       | 12    | 0.01295(3) |
| OC1                | 0.4294(9)  | 0.0        | 0.0        | 0.465(4)  | 12    | 0.06133    |
| OC2                | 0.2402(9)  | 0.0        | 0.0        | 0.465(4)  | 12    | 0.06133    |
| CO1                | 0.3369(1)  | 0.0        | 0.0        | 0.465(4)  | 12    | 0.06133    |
| OC3                | 0.3347(8)  | 0.4615(1)  | 0.3347(8)  | 0.0411(2) | 24    | 0.06133    |
| OC4                | 0.3728(2)  | 0.6275(2)  | 0.3728(2)  | 0.123(6)  | 8     | 0.06133    |
| CO2                | 0.3687(3)  | 0.5380(2)  | 0.3687(3)  | 0.0411(2) | 24    | 0.06133    |

  

| K-Rho (0.5 bar, II) | x          | y          | z          | Occup. | Mult. | Uiso       |
|---------------------|------------|------------|------------|--------|-------|------------|
| Si1                 | 0.26619(2) | 0.11666(2) | 0.41408(2) | 0.8    | 48    | 0.01295(3) |
| Al1                 | 0.26619(2) | 0.11666(2) | 0.41408(2) | 0.2    | 48    | 0.01295(3) |
| O1                  | 0.1991(4)  | 0.1991(4)  | 0.3977(6)  | 1.0    | 48    | 0.01295(3) |
| O2                  | 0.1332(4)  | 0.1332(4)  | 0.6290(5)  | 1.0    | 24    | 0.01295(3) |
| O3                  | 0.0238(4)  | 0.21063(3) | 0.3761(4)  | 1.0    | 24    | 0.01295(3) |
| K (S6R)             | 0.3458(5)  | 0.3458(5)  | 0.3458(5)  | 0.4328 | 8     | 0.01295(3) |
| K (S8R)             | 0.3784(6)  | 0.0        | 0.0        | 0.5    | 12    | 0.01295(3) |
| OC1                 | 0.4413(9)  | 0.0        | 0.0        | 0.5    | 12    | 0.06133    |
| OC2                 | 0.2609(9)  | 0.0        | 0.0        | 0.5    | 12    | 0.06133    |
| CO1                 | 0.3502(1)  | 0.0        | 0.0        | 0.5    | 12    | 0.06133    |
| OC3                 | 0.3631(1)  | 0.4926(1)  | 0.3631(1)  | 0.2    | 24    | 0.06133    |
| OC4                 | 0.3440(1)  | 0.6560(1)  | 0.3440(1)  | 0.6    | 8     | 0.06133    |
| CO2                 | 0.3641(1)  | 0.5802(2)  | 0.3641(1)  | 0.2    | 24    | 0.06133    |

  

| K-Rho (1 bar) | x          | y          | z          | Occup.    | Mult. | Uiso       |
|---------------|------------|------------|------------|-----------|-------|------------|
| Si1           | 0.26624(7) | 0.11655(8) | 0.41504(8) | 0.8       | 48    | 0.01142(2) |
| Al1           | 0.26624(7) | 0.11655(8) | 0.41504(8) | 0.2       | 48    | 0.01142(2) |
| O1            | 0.20030(1) | 0.20030(1) | 0.39406(3) | 1.0       | 48    | 0.01142(2) |
| O2            | 0.13504(2) | 0.13504(2) | 0.63192(2) | 1.0       | 24    | 0.01142(2) |
| O3            | 0.02295(2) | 0.21134(1) | 0.37890(2) | 1.0       | 24    | 0.01142(2) |
| K (S6R)       | 0.34714(2) | 0.34714(2) | 0.34714(2) | 0.4328(3) | 8     | 0.0312     |
| K (S8R)       | 0.37326(3) | 0.0        | 0.0        | 0.5       | 12    | 0.0312     |
| OC1           | 0.4372(4)  | 0.0        | 0.0        | 0.5       | 12    | 0.0232(2)  |
| OC2           | 0.3097(5)  | 0.0        | 0.0        | 0.5       | 12    | 0.0232(2)  |
| CO1           | 0.1740(9)  | 0.0        | 0.0        | 0.5       | 12    | 0.0232(2)  |
| OC3           | 0.3631(6)  | 0.5028(7)  | 0.3631(6)  | 0.2167    | 24    | 0.0232(2)  |
| OC4           | 0.3401(4)  | 0.6599(4)  | 0.3401(4)  | 0.65      | 8     | 0.0232(2)  |
| CO2           | 0.3529(8)  | 0.5903(1)  | 0.3529(8)  | 0.2167    | 24    | 0.0232(2)  |

| <b>K-Rho (heated to<br/>remove CO<sub>2</sub>)</b> | <b>x</b>   | <b>y</b>  | <b>z</b>  | <b>Occupancy</b> | <b>Mult.</b> | <b>Uiso</b> |
|----------------------------------------------------|------------|-----------|-----------|------------------|--------------|-------------|
| Si1                                                | 0.2688(1)  | 0.1192(2) | 0.4185(2) | 0.8              | 48           | 0.0189(7)   |
| Al1                                                | 0.2688(1)  | 0.1192(2) | 0.4185(2) | 0.2              | 48           | 0.0189(7)   |
| O1                                                 | 0.2096(3)  | 0.2096(3) | 0.4006(5) | 1.0              | 48           | 0.0180(1)   |
| O2                                                 | 0.1305 (3) | 0.1305(3) | 0.6223(4) | 1.0              | 24           | 0.0180(1)   |
| O3                                                 | 0.0307(3)  | 0.2102(2) | 0.3854(3) | 1.0              | 24           | 0.0180(1)   |
| K (D8R)                                            | 0.5        | 0.0       | 0.0       | 0.310(5)         | 6            | 0.04083     |
| K (S8R)                                            | 0.3659(5)  | 0.0       | 0.0       | 0.574(5)         | 12           | 0.06832     |
| K (S6R)                                            | 0.3220(2)  | 0.3220(2) | 0.3220(2) | 0.093(8)         | 8            | 0.03901     |

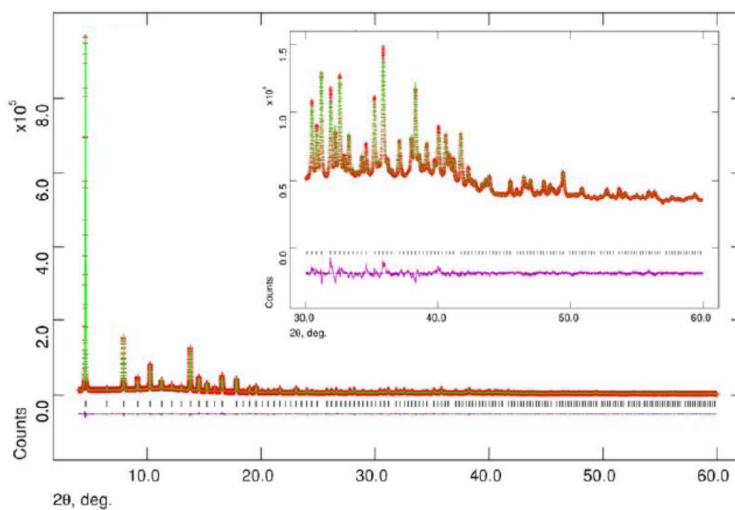

Figure S9.1 Final observed, calculated and difference Rietveld plots for the synchrotron powder X-ray diffraction data refinement ( $\lambda = 0.826956 \text{ \AA}$ ) of dehydrated K-Rho.

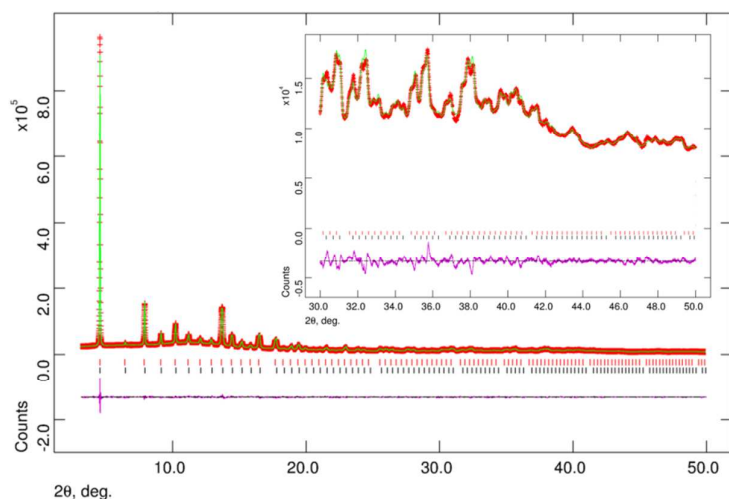

Figure S9.2 Final observed, calculated and difference Rietveld plots for the synchrotron powder X-ray data refinement ( $\lambda = 0.826956 \text{ \AA}$ ) of K-Rho in equilibrium with 0.5 bar of CO<sub>2</sub>. The profile was fitted using two phases of K-Rho, both I-43m symmetry, with different  $a$  parameters.

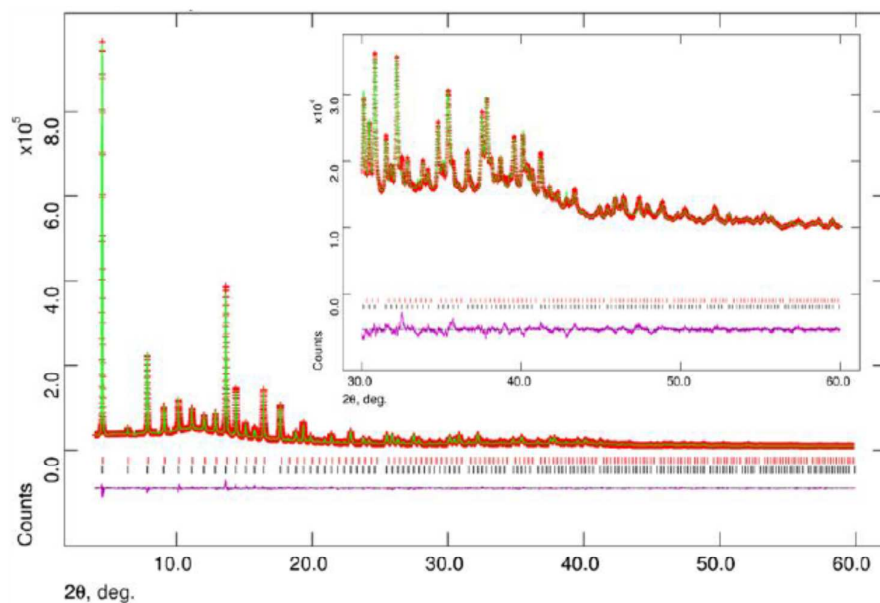

Figure S9.3 Final observed, calculated and difference Rietveld plots for the synchrotron PXRD data refinement ( $\lambda = 0.826956 \text{ \AA}$ ) of K-Rho in equilibrium with 1 bar  $\text{CO}_2$ .

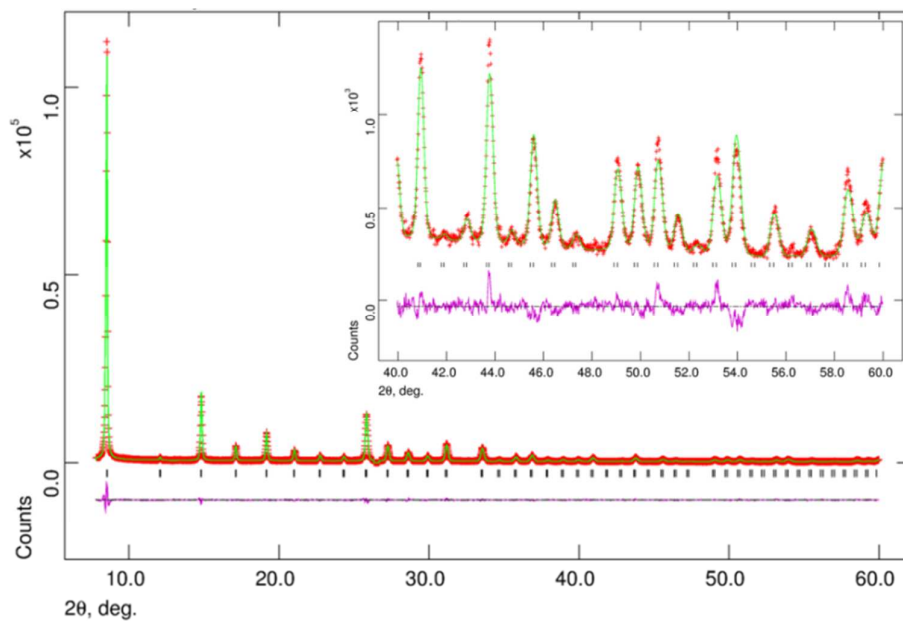

Figure S9.4 Final observed, calculated and difference Rietveld plots for the laboratory powder X-ray data refinement ( $K\alpha_1 = 1.54056 \text{ \AA}$ ,  $K\alpha_2 = 1.54430 \text{ \AA}$ ) of K-Rho after adsorption of  $\text{CO}_2$  and heating at 573 K in helium to remove all adsorbed  $\text{CO}_2$ .



S10. Cation positions in Na-, K- and Cs-Rho dehydrated and when in contact with CO<sub>2</sub>

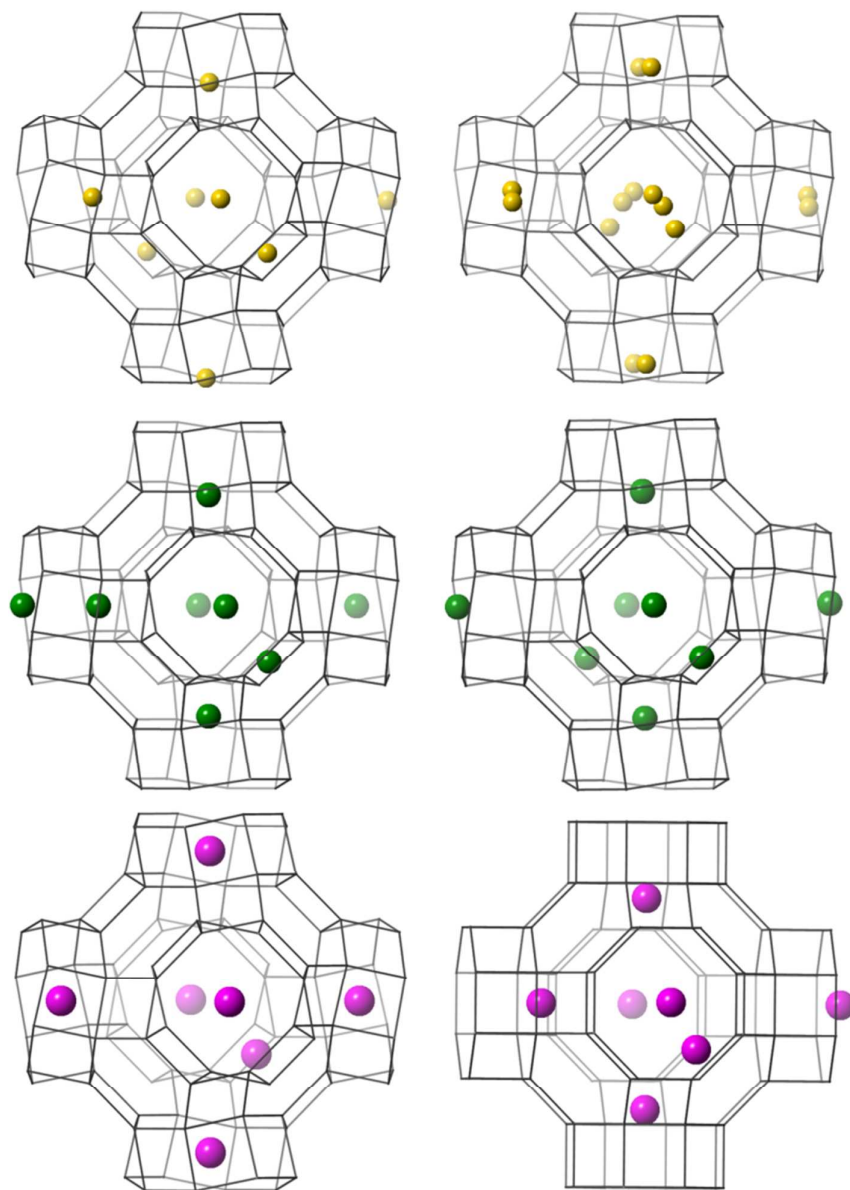

Figure S10.1 Plots showing (top) Na, (middle) K and Cs cation positions in cages of Rho (T-T linkages only shown) in (left) dehydrated structures and (right) when in contact with 1, 1 and 4 bar CO<sub>2</sub>, respectively.

S11. Fractional atomic coordinates, occupancies and isotropic displacement parameters (in Å<sup>2</sup>) of K-chabazite dehydrated and with adsorbed CO<sub>2</sub>

Table S11

| <b>K-chabazite</b> | <b>x</b>  | <b>y</b>  | <b>z</b>  | <b>Occup.</b> | <b>Multipl.</b> | <b>Uiso</b> |
|--------------------|-----------|-----------|-----------|---------------|-----------------|-------------|
| Si1                | 0.9999(1) | 0.2239(2) | 0.1064(1) | 0.75          | 36              | 0.0516(2)   |
| Al1                | 0.9999(1) | 0.2239(2) | 0.1064(1) | 0.25          | 36              | 0.0516(2)   |
| O1                 | 0.9058(3) | 0.0942(3) | 0.1247(4) | 1.0           | 18              | 0.0417(3)   |
| O2                 | 0.9726(5) | 0.3060(5) | 0.1667(0) | 1.0           | 18              | 0.0417(3)   |
| O3                 | 0.1225(2) | 0.2448(4) | 0.1354(3) | 1.0           | 18              | 0.0417(3)   |
| O4                 | 0.0       | 0.2540(4) | 0.0       | 1.0           | 18              | 0.0417(3)   |
| K (S8R)            | 0.5       | 0.5       | 0.0       | 0.996(9)      | 9               | 0.1149(8)   |

  

| <b>K-chabazite<br/>(1bar)</b> | <b>x</b>  | <b>y</b>  | <b>z</b>  | <b>Occup.</b> | <b>Multipl.</b> | <b>Uiso</b> |
|-------------------------------|-----------|-----------|-----------|---------------|-----------------|-------------|
| Si1                           | 1.0024(4) | 0.2286(4) | 0.1072(3) | 0.75          | 36              | 0.023(4)    |
| Al1                           | 1.0024(4) | 0.2286(4) | 0.1072(3) | 0.25          | 36              | 0.023(4)    |
| O1                            | 0.8990(5) | 0.1010(5) | 0.1275(9) | 1.0           | 18              | 0.023(4)    |
| O2                            | 0.9793(8) | 0.3127(8) | 0.1667    | 1.0           | 18              | 0.023(4)    |
| O3                            | 0.1137(3) | 0.2272(6) | 0.1329(7) | 1.0           | 18              | 0.023(4)    |
| O4                            | 0.0       | 0.2506(1) | 0.0       | 1.0           | 18              | 0.023(4)    |
| K (S8R)                       | 0.5       | 0.5       | 0.0       | 0.5           | 9               | 0.002(7)    |
| K (S6R)                       | 0.0       | 0.0       | 0.2295(1) | 0.662(1)      | 6               | 0.002(7)    |
| C100                          | 0.6879    | 0.1990    | 0.7556    | 0.288(5)      | 36              | 0.100(3)    |
| O100                          | 0.2046    | 0.5884    | 0.2185    | 0.288(5)      | 36              | 0.100(3)    |
| O200                          | 0.5818    | 0.4836    | -0.0589   | 0.288(5)      | 36              | 0.100(3)    |

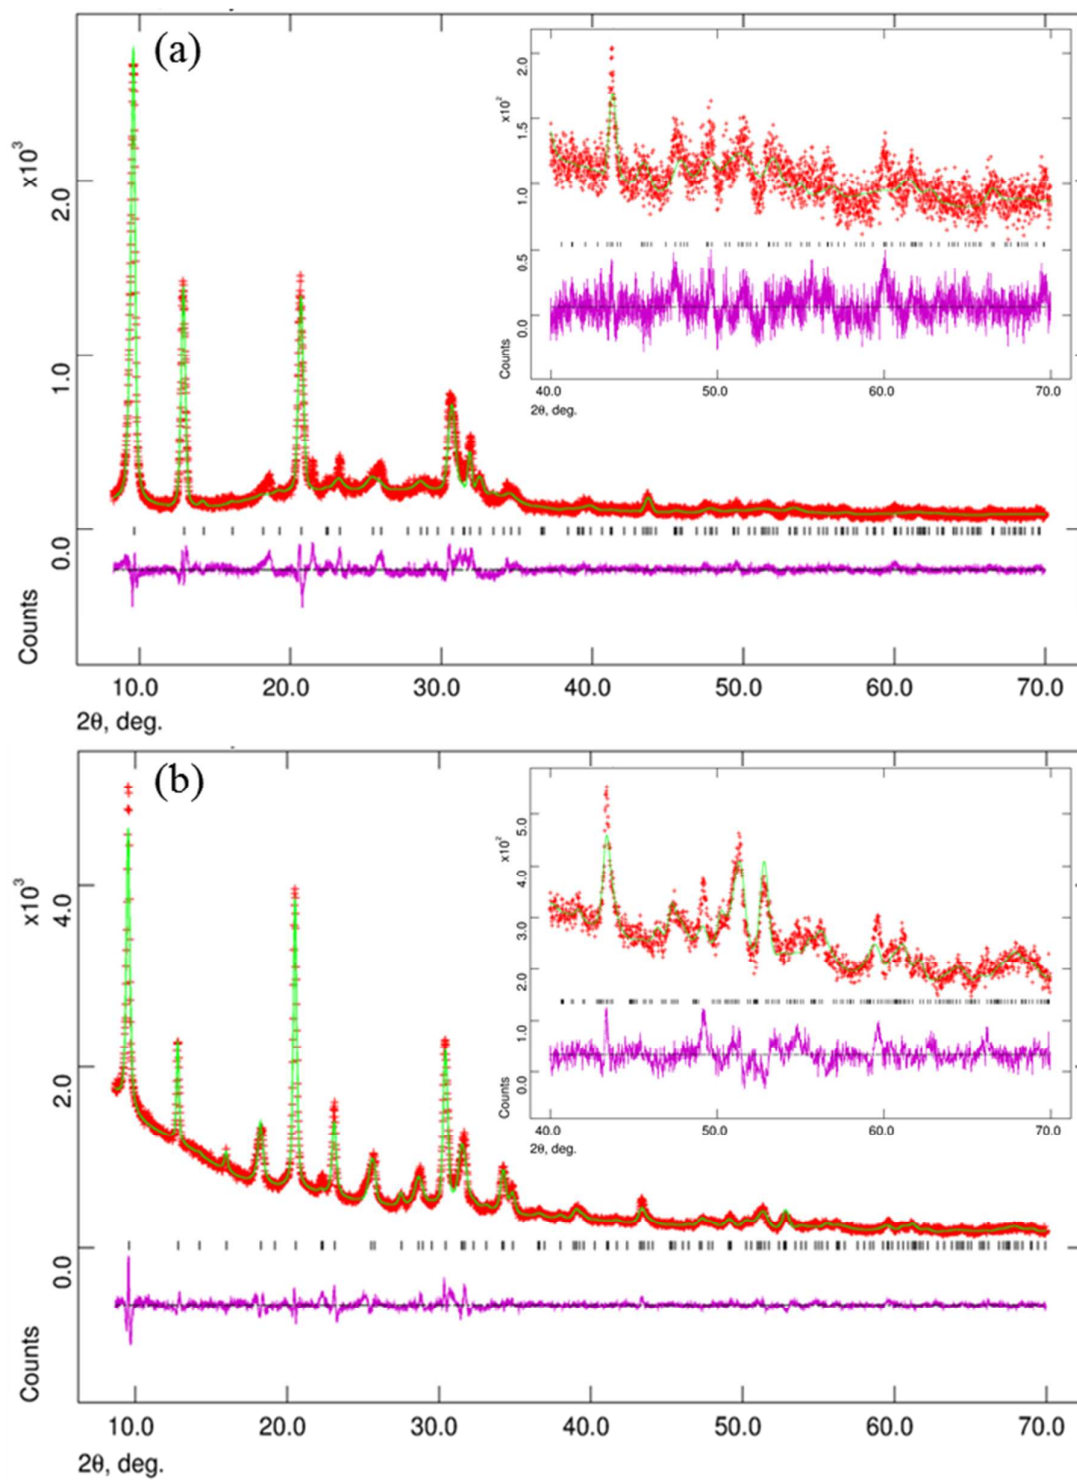

Figure S11.1 Final observed, calculated and difference Rietveld plots for the laboratory powder data refinement ( $\lambda_1 = 1.54056 \text{ \AA}$ ,  $\lambda_2 = 1.54430 \text{ \AA}$ ) of (a) dehydrated K-chabazite and (b) K-chabazite in equilibrium with 1 bar of  $\text{CO}_2$ .

## References

1. Chatelain T., Patarin J., Fousson E., Soulard M., Guth J. L. and Schulz P., *Microporous Mater.*, **1995**, *4*, 231-238
2. Lozinska M. M., Mangano E., Mowat J. P. S., Shepherd A. M., Howe R. F., Thompson S. P., Parker J. E., Brandani S. and Wright P. A., *J. Am. Chem. Soc.*, **2012**, *134*, 17628-17642
3. Zhang J., Singh R. and Webley P. A., *Micropor. Mesopor. Mat.*, **2008**, *111*, 478-487
4. Dyer A. and Enamy H., *Zeolites*, **1981**, *1*, 66-68
5. Lee Y., Reisner B. A., Hanson J. C., Jones G. A., Parise J. B., Corbin D. R., Toby B. H., Freitag A. and Larese J. Z., *J. Phys. Chem. B*, **2001**, *105*, 7188-7199
6. Langmi H. W., Book D., Walton A., Johnson S. R., Al-Mamouri M. M., Speight J. D., Edwards P. P., Harris I. R. and Anderson P. A., *J. Alloys Compd.*, **2005**, *404–406*, 637-642
7. Ridha F. N., Yang Y. and Webley P. A., *Micropor. Mesopor. Mat.*, **2009**, *117*, 497-507
